# Supplementary material for: Effectiveness and Costs Associated to Adding Cetuximab or Bevacizumab to Chemotherapy as Initial Treatment in Metastatic Colorectal Cancer: Results from the Observational FABIO Project
Source: MDPI journal article supplement (doi:10.3390/cancers12040839), 2020-03-31
Supplement: s1 [file s1]

## Supplementary Materials

**Table S1.** Region-specific restricted mean survival time (RMST) and median overall survival (OS) of metastatic colorectal cancer cohort members on first-line treatment with biologic-based (bevacizumab or cetuximab; Bio + CT) or standard chemotherapy (CT) alone. FABIO project, Italy, 2010–2016.

| Region   | RMST (Months) |      |                 | Median OS (Months) |      |
|----------|---------------|------|-----------------|--------------------|------|
|          | Bio + CT      | CT   | <i>p</i> -value | Bio + CT           | CT   |
| Lombardy | 31.8          | 32.9 | 0.392           | 20.5               | 16.8 |
| Lazio    | 31.1          | 31.2 | 0.956           | 25.4               | 23.0 |
| Marche   | 16.9          | 20.9 | 0.479           | 10.9               | 17.6 |
| Abruzzo  | 26.7          | 31.1 | 0.319           | 18.8               | 25.4 |
| Sardinia | 20.8          | 20.0 | 0.622           | 21.0               | 22.7 |
| Sicily   | 26.8          | 26.1 | 0.549           | 20.5               | 18.9 |

**Table S2.** ICD-9 CM and ATC codes of diseases/conditions and medicaments drugs used for the current study.

| Disease/Condition    | ICD9-CM Codes                                                                                                                                                                                                                                                                                                                                      |
|----------------------|----------------------------------------------------------------------------------------------------------------------------------------------------------------------------------------------------------------------------------------------------------------------------------------------------------------------------------------------------|
| Colorectal cancer    | 153, 154.0, 154.1, 154.8                                                                                                                                                                                                                                                                                                                           |
| Any malignant cancer | 140–208                                                                                                                                                                                                                                                                                                                                            |
| Chemotherapy         | V58.1, 99.25, 99.28, 00.10                                                                                                                                                                                                                                                                                                                         |
| Distant metastasis   | 197, 198, 199                                                                                                                                                                                                                                                                                                                                      |
| Colorectal surgery   | 32.3, 34.59, 42.86, 44.39, 45.41, 45.43, 45.49, 45.51, 45.61, 45.62, 45.71–45.76, 45.79, 45.8, 45.90–45.94, 46.01–46.04, 46.10, 46.11, 46.13, 46.14, 46.20–46.23, 46.40, 46.43, 46.51, 46.52, 46.76, 46.79, 46.85, 46.93, 46.94, 48.33, 48.35, 48.49, 48.5, 48.62, 48.63, 48.69, 48.79, 50.22, 50.29, 50.3, 54.12, 54.4, 54.51, 54.59, 54.61, 68.8 |
| Drug                 | ATC codes                                                                                                                                                                                                                                                                                                                                          |
| Bevacizumab          | L01XC07                                                                                                                                                                                                                                                                                                                                            |
| Cetuximab            | L01XC06                                                                                                                                                                                                                                                                                                                                            |
| Any oncologic drug   | L01                                                                                                                                                                                                                                                                                                                                                |

| Region                                                                                     | Overall | Lombardy  | Lazio     | Marche    | Abruzzo   | Sardinia  | Sicily    |
|--------------------------------------------------------------------------------------------|---------|-----------|-----------|-----------|-----------|-----------|-----------|
| Recruitment period                                                                         |         | 2010–2014 | 2011–2014 | 2012–2014 | 2011–2014 | 2015–2016 | 2012–2015 |
| Patients with colorectal cancer (CRC) diagnosis during the recruitment period (index date) |         |           |           |           |           |           |           |
|                                                                                            | 108,858 | 57,120    | 20,205    | 6047      | 5675      | 3458      | 16,353    |
| Adult patients with a new diagnosis of CRC during the recruitment period (incident cases)  |         |           |           |           |           |           |           |
|                                                                                            | 68,767  | 30,530    | 15,010    | 4118      | 4068      | 2273      | 12,768    |
| Patients with diagnosis of distant metastasis within 180 days from the index date          |         |           |           |           |           |           |           |
|                                                                                            | 14,390  | 6181      | 3183      | 834       | 859       | 604       | 2729      |
| Patients treated within 6 months from metastasis diagnosis with either Bio+CT or CT alone  |         |           |           |           |           |           |           |
|                                                                                            | 8247    | 3187      | 2045      | 550       | 612       | 349       | 1504      |
| Final matched cohort                                                                       |         |           |           |           |           |           |           |
| Biological arm                                                                             | 1896    | 949       | 495       | 9         | 30        | 60        | 353       |
| Standard therapy alone arm                                                                 | 5678    | 1898      | 1972      | 36        | 120       | 240       | 1412      |

**Figure S1.** Flow-chart of inclusion and exclusion criteria according with the Italian region where patients were diagnosed. FABIO project, Italy, 2010–2016.

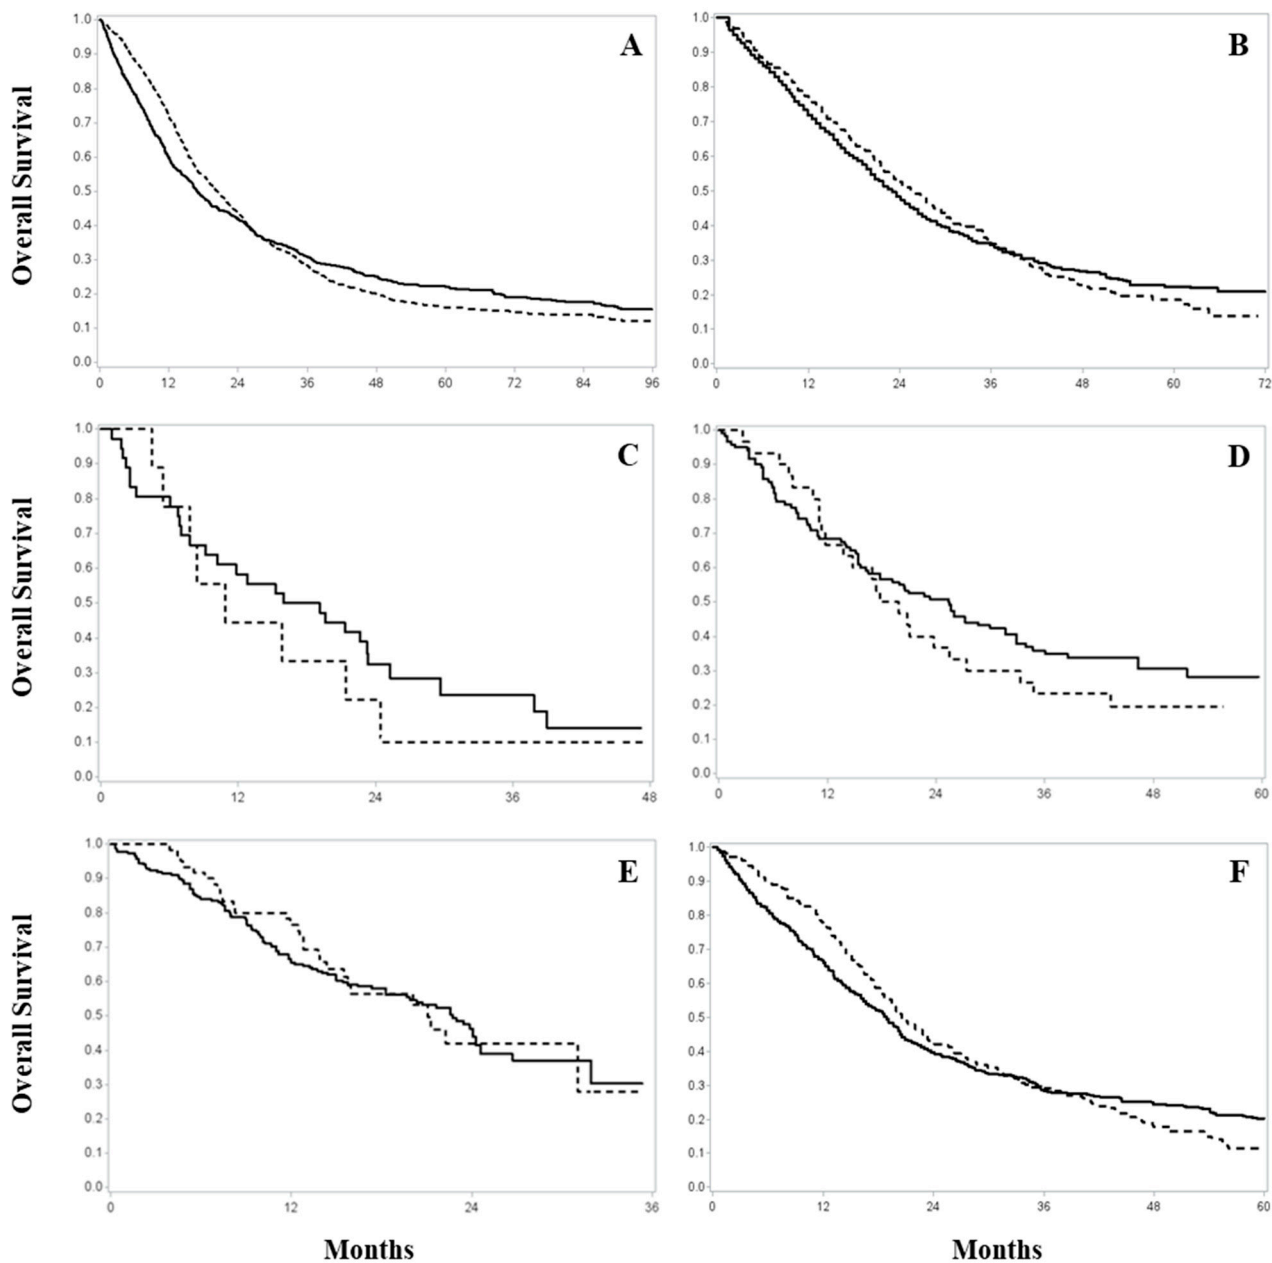

**Figure S2.** Kaplan-Meier overall survival curves of metastatic colorectal cancer cohort members on first-line treatment with biologic-based (bevacizumab or cetuximab, dotted line) or standard chemotherapy (continuous line) alone in Lombardy (A), Lazio (B), Marche (C), Abruzzo (D), Sardinia (E) and Sicily (F) Region. FABIO project, Italy, 2010–2016.

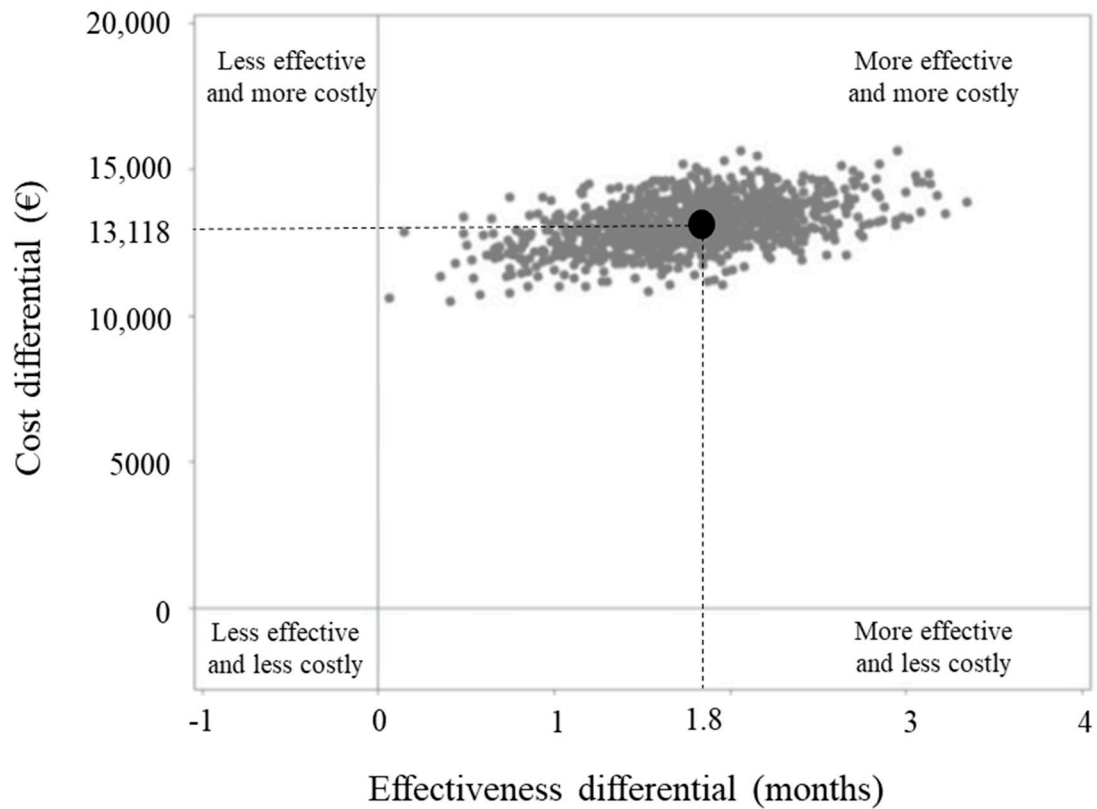

**Figure S3.** ICER scatterplot measured during the first two years after starting treatment comparing metastatic colorectal cancer cohort members on first-line treatment with biologic-based (bevacizumab or cetuximab, Bio+CT) or standard chemotherapy (CT) alone. FABIO project, Lombardy Region, 2010–2014.
